# Supplementary material
Source: Springer Nature journal article supplement (https://www.springermedizin.de/resource/supplementary/13098_2011_188_MOESM5_ESM.pdf/9670646)

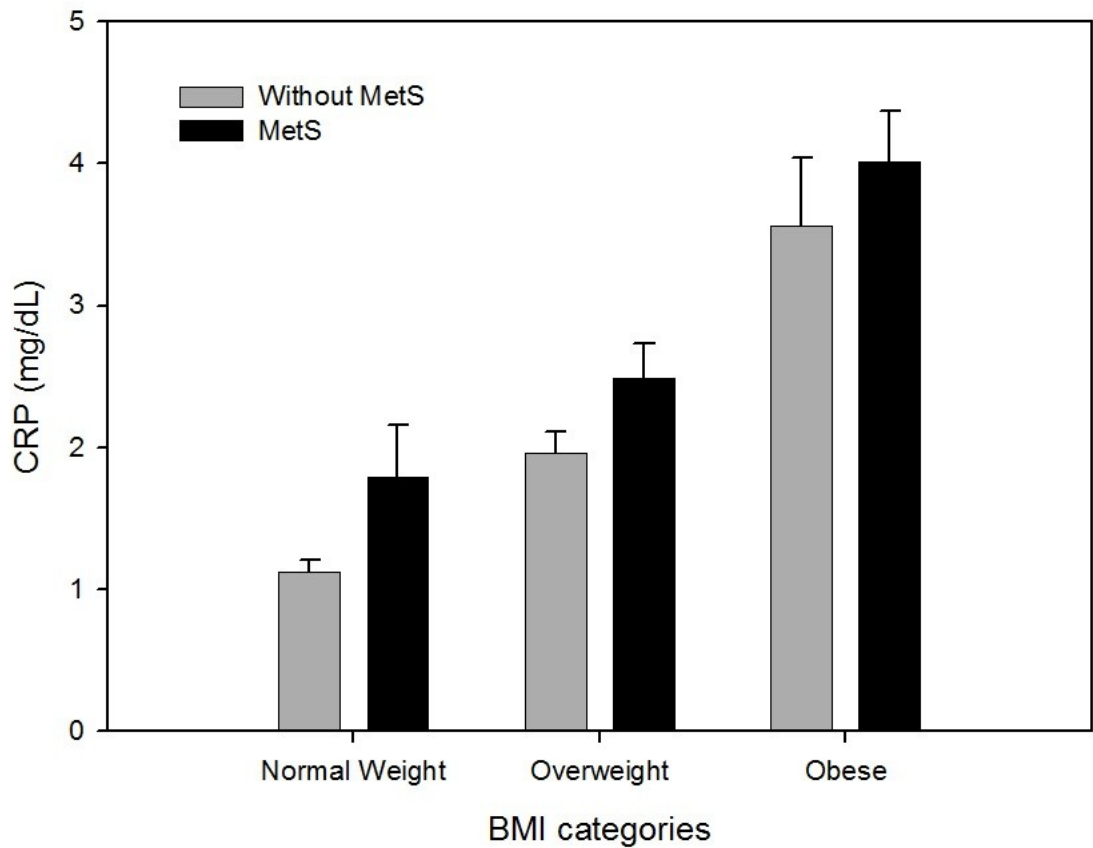

Supplement: MOESM5 [file 9670646]
